# Supplementary material for: Effects of Co-Culture EBV-miR-BART1-3p on Proliferation and Invasion of Gastric Cancer Cells Based on Exosomes
Source: MDPI journal article supplement (doi:10.3390/cancers15102841), 2023-05-19
Supplement: s1 [file s1]

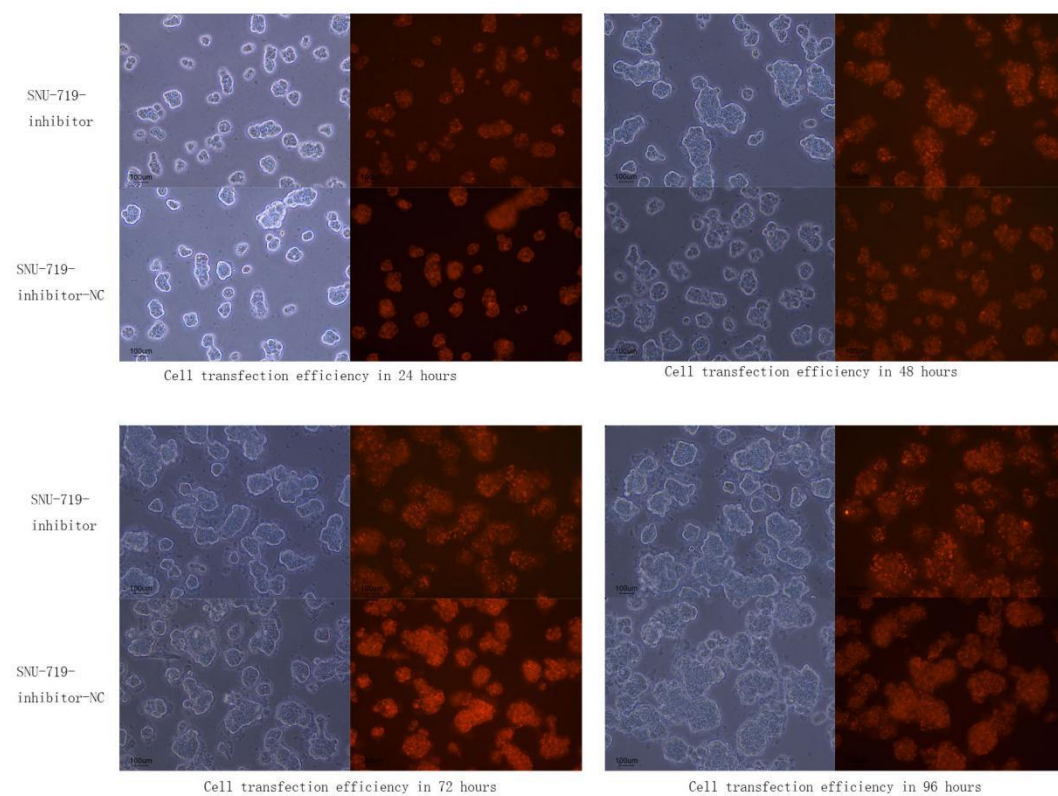

**Supplementary figure 1.** Cell transfection efficiency in different time.

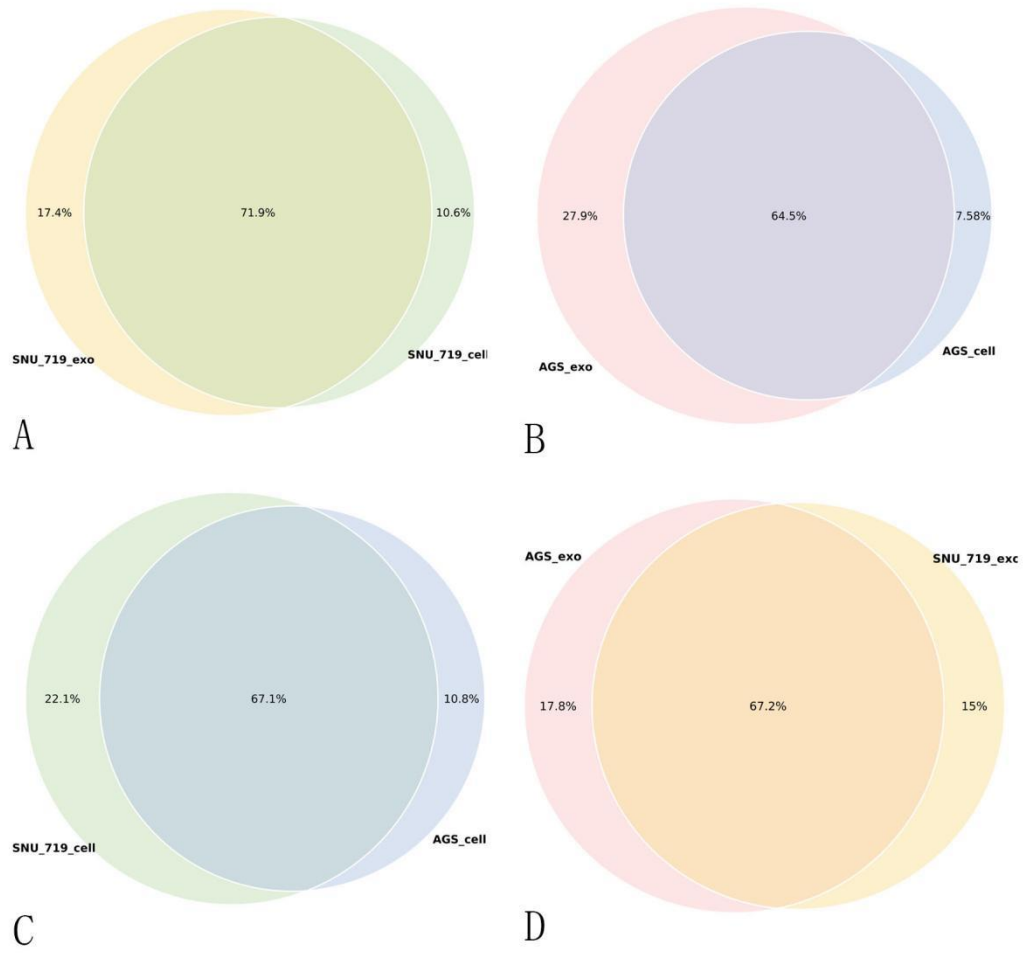

**Supplementary figure 2.** Distribution of small RNAs in cells and exosomes. (A-D) Venn diagrams of common and unique sequence analysis in SNU-719 and AGS cells and exosomes.
